# Supplementary material for: Double-crystalline PLLA-b-PVDF-b-PLLA triblock copolymers: preparation and crystallization
Source: Royal Society of Chemistry journal article supplement (doi:10.1039/c3py01560b), 2013-12-18
Supplement: c3py01560b.pdf [file c3py01560b.pdf]

## Double-crystalline PLLA-*b*-PVDF-*b*-PLLA triblock copolymers: preparation and crystallization

Vincent S.D. Voet, Gert O.R. Alberda van Ekenstein, Niels. L. Meereboer, Anton H. Hofman, Gerrit ten Brinke, Katja Loos\*

Department of Polymer Chemistry, Zernike Institute for Advanced Materials, University of Groningen, Nijenborgh 4, 9747 AG Groningen, The Netherlands.

### Electronic Supplementary Information

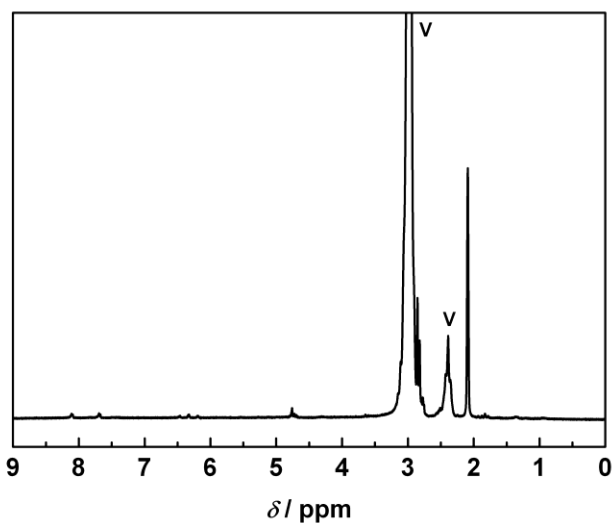

**Figure S1.** <sup>1</sup>H-NMR spectrum of bromine-terminated PVDF<sup>18</sup> in acetone-*d*<sub>6</sub>. Signals corresponding to PVDF backbone are designated with “V”.

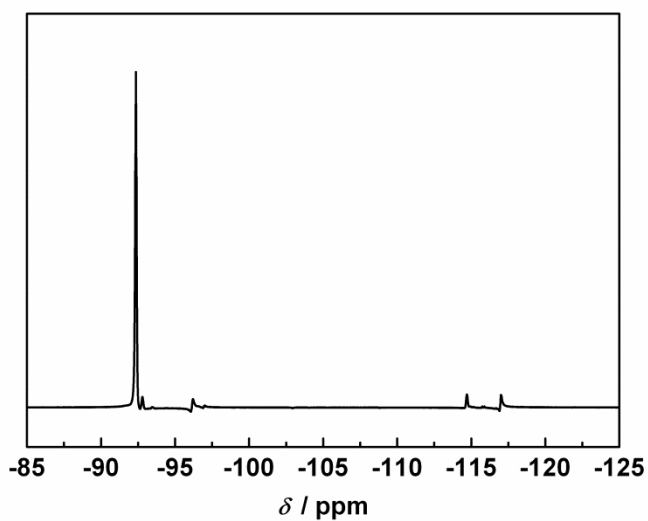

**Figure S2.**  $^{19}\text{F}$ -NMR spectra of bromine-terminated PVDF<sup>18</sup> in acetone-*d*<sub>6</sub>.

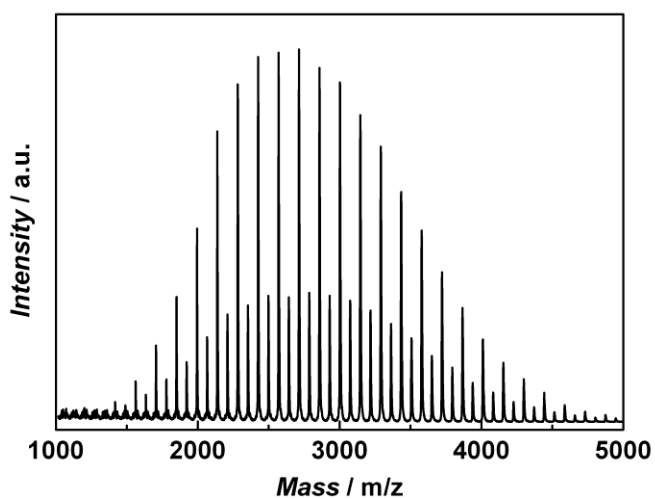

**Figure S3.** Maldi-ToF spectrum of alkyne-terminated PLLA<sup>3</sup>. Sodium ions were used for cationization.

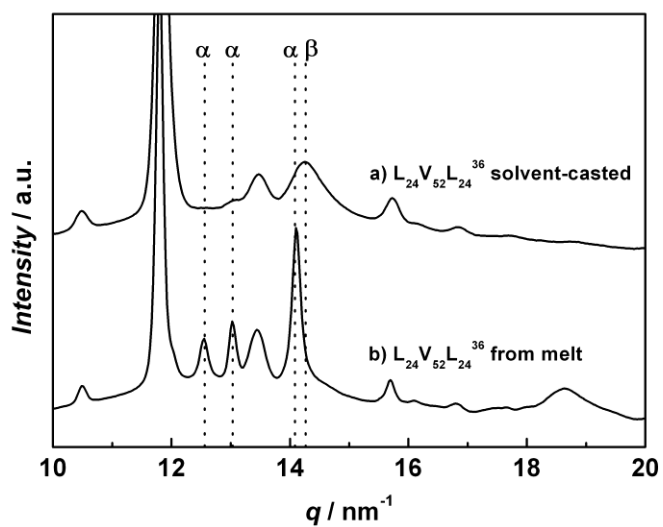

**Figure S4.** WAXS patterns of (a) L<sub>24</sub>V<sub>52</sub>L<sub>24</sub><sup>36</sup> cast from DMF solution and (b) L<sub>24</sub>V<sub>52</sub>L<sub>24</sub><sup>36</sup> crystallized from melt.

**Table S1.** m/z values corresponding to high intensity mass distribution in Figure S3. Suggested chemical structure:

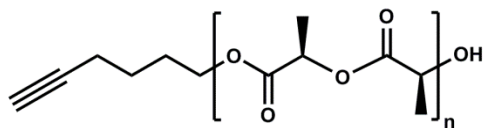

| m/z <sub>exp</sub> | m/z <sub>theor</sub> <sup>a</sup> | Δ <sub>m/z</sub> |
|--------------------|-----------------------------------|------------------|
| 1562.6             | 1562.1                            | -                |
| 1706.6             | 1706.2                            | 144.0            |
| 1850.6             | 1850.3                            | 144.0            |
| 1994.6             | 1994.4                            | 144.0            |
| 2138.6             | 2138.5                            | 144.0            |
| 2282.6             | 2282.6                            | 144.0            |
| 2426.6             | 2426.7                            | 144.0            |
| 2570.6             | 2570.8                            | 144.0            |
| 2714.6             | 2714.9                            | 144.0            |
| 2858.6             | 2859.0                            | 144.0            |
| 3002.7             | 3003.1                            | 144.1            |
| 3146.7             | 3147.2                            | 144.0            |
| 3290.8             | 3291.3                            | 144.1            |
| 3434.9             | 3435.4                            | 144.1            |
| 3579.0             | 3579.5                            | 144.1            |
| 3723.0             | 3723.6                            | 144.0            |
| 3867.0             | 3867.7                            | 144.0            |
| 4011.1             | 4011.8                            | 144.1            |
| 4155.1             | 4155.9                            | 144.0            |
| 4299.1             | 4300.0                            | 144.0            |

<sup>a</sup>m/z<sub>theor</sub> = 98.1 (mass initiator rest) + 23.0 (mass sodium ion) + 144.1 (mass repeating unit) \* n (number of repeating units).

**Table S2.** m/z values corresponding to low intensity mass distribution in Figure S3. Suggested chemical structure:

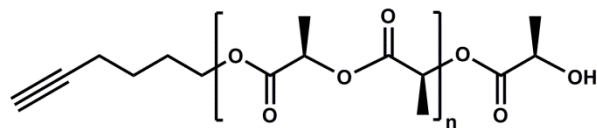

| m/z <sub>exp</sub> | m/z <sub>theor</sub> <sup>a</sup> | Δ <sub>m/z</sub> |
|--------------------|-----------------------------------|------------------|
| 1634.5             | 1634.2                            | -                |
| 1778.5             | 1778.3                            | 144.0            |
| 1922.5             | 1922.4                            | 144.0            |
| 2066.5             | 2066.5                            | 144.0            |
| 2210.5             | 2210.6                            | 144.0            |
| 2354.5             | 2354.7                            | 144.0            |
| 2498.5             | 2498.8                            | 144.0            |
| 2642.5             | 2642.9                            | 144.0            |
| 2786.6             | 2787.0                            | 144.1            |
| 2930.7             | 2931.1                            | 144.1            |
| 3074.7             | 3075.2                            | 144.0            |
| 3218.8             | 3219.3                            | 144.1            |
| 3362.9             | 3363.4                            | 144.1            |
| 3506.9             | 3507.5                            | 144.0            |
| 3651.0             | 3651.5                            | 144.1            |
| 3795.0             | 3795.6                            | 144.0            |
| 3939.1             | 3939.8                            | 144.1            |
| 4083.2             | 4083.9                            | 144.1            |
| 4227.2             | 4228.0                            | 144.0            |

<sup>a</sup>m/z<sub>theor</sub> = 98.1 (mass initiator rest) + 23.0 (mass sodium ion) + 144.1 (mass repeating unit) \* n (number of repeating units) + 72.1 (mass 1/2 repeating unit).
